# Supplementary material for: Mechanochemical ZIF-9 formation: in situ analysis and photocatalytic enhancement evaluation
Source: Royal Society of Chemistry journal article supplement (doi:10.1039/d4mr00114a), 2024-11-19
Supplement: d4mr00114a1.pdf [file d4mr00114a1.pdf]

## Electronic Supplementary Information (ESI†)

### Mechanochemical ZIF-9 Formation: In Situ Analysis and Photocatalytic Enhancement Evaluation

Noelia Rodríguez-Sánchez<sup>1,2</sup>, Carsten Prinz<sup>1</sup>, Ralf Bienert<sup>1</sup>, Menta Ballesteros<sup>2,3</sup>, A. Rabdel Ruiz Salvador<sup>2,4</sup>, Biswajit Bhattacharya<sup>1\*</sup>, Franziska Emmerling<sup>1,5\*</sup>

\*Corresponding authors: BB [biswajit.bhattacharya@bam.de](mailto:biswajit.bhattacharya@bam.de) and FE [franziska.emmerling@bam.de](mailto:franziska.emmerling@bam.de)

<sup>1</sup>BAM Federal Institute for Materials Research and Testing, Richard-Willstätter-Straße 11, 12489, Berlin, Gemany.

<sup>2</sup>Center for Nanoscience and Sustainable Technologies (CNATS), Universidad Pablo de Olavide, Ctra. Utrera km. 1, 41013, Seville, Spain.

<sup>3</sup>Department of Molecular Biology and Biochemistry Engineering, Universidad Pablo de Olavide, Ctra. Utrera km. 1, 41013, Seville, Spain.

<sup>4</sup> Department of Physical, Chemical and Natural Systems, Universidad Pablo de Olavide, Ctra. Utrera km. 1, 41013, Seville, Spain.

<sup>5</sup>Department of Chemistry, Humboldt-Universität of Berlin, Brook-Taylor-Strasse 2, 12489 Berlin, Germany.

### Content

|                                                                                                                 |   |
|-----------------------------------------------------------------------------------------------------------------|---|
| Study of adsorption kinetics models.....                                                                        | 3 |
| Figure S.1 X-Ray Diffraction data for mechanochemical and solvothermal ZIF-9.....                               | 3 |
| Figure S.2. X-Ray Diffraction data of NH <sub>4</sub> Cl concentration evaluation in mechanochemical ZIF-9..... | 4 |
| Figure S.3. X-Ray diffraction data for solvent evaluation in mechanochemical ZIF-9.....                         | 4 |
| Figure S.4. X-Ray diffraction data for different shaker milling instruments.....                                | 5 |
| Figure S.5. X-Ray diffraction data in large scale of mechanochemical ZIF-9.....                                 | 5 |
| Figure S.6. Adsorption isotherms for solvothermal synthesized and mechanochemical ZIF-9.....                    | 6 |
| Table S.1. BET data of solvothermal and mechanochemical ZIF-9.....                                              | 6 |
| Figure S.7. EDS data for solvothermal and mechanochemical synthesized ZIF-9.....                                | 7 |
| Figure S.8. MB degradation by photolysis and combined action of light and H <sub>2</sub> O <sub>2</sub> .....   | 8 |

Figure S.9. MB adsorption models for mechanochemical ZIF-9.....9

Table S.2. Langmuir, Freundlich and Tempkin adsorption model parameters.....10

Figure S.10. Zero-order and pseudo-second order kinetics models for ZIF-9.....10

Figure S.11. Recyclability and first- order kinetic of mechanochemical synthesized ZIF-9.....11

## Study of adsorption kinetics models

Langmuir, Freundlich, and Temkin adsorption models were analyzed for mechanochemical ZIF-9 based on the dark period during photo-Fenton test. The calculations of these analyses were based on the equations [1-3] corresponding to Langmuir, Freundlich and Temkin isotherms respectively:

$$\frac{C_e}{q_e} = \frac{1}{q_{max}K_L} + \frac{C_e}{q_{max}} \quad \text{Eq.1}$$

$$\ln q_e = \frac{1}{n} \ln C_e + \ln K_F \quad \text{Eq.2}$$

$$q_e = K_T \ln f + K_T \ln C_e \quad \text{Eq.3}$$

Where  $q_e$  is the equilibrium adsorption capacity ( $\text{mg g}^{-1}$ ),  $q_{max}$  is the maximum adsorption capacity ( $\text{mg g}^{-1}$ ), and  $K_L$  and  $K_F$  are the Langmuir and Freundlich constants, respectively.  $K_T$  and  $f$  ( $\text{mg L}^{-1}$ ) are the Temkin and binding constants, respectively.

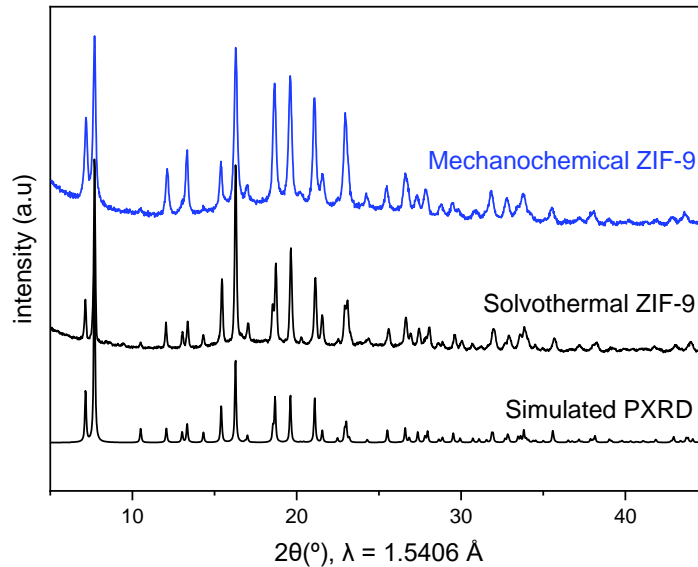

Fig. S.1. X-Ray Diffraction Patterns for solvothermal synthesized ZIF-9 (black) and mechanochemical synthesized ZIF-9 (blue).

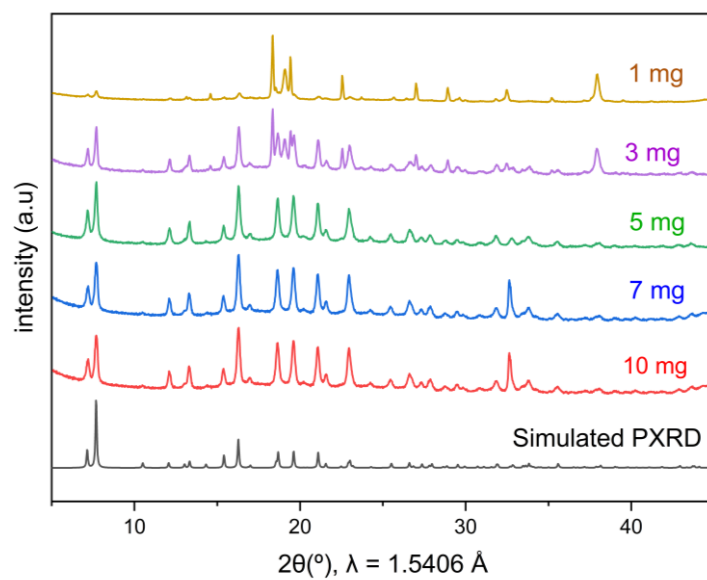

Fig.S.2. Evaluation of the concentration of  $\text{NH}_4\text{Cl}$  in the synthesis of mechanochemical ZIF-9.

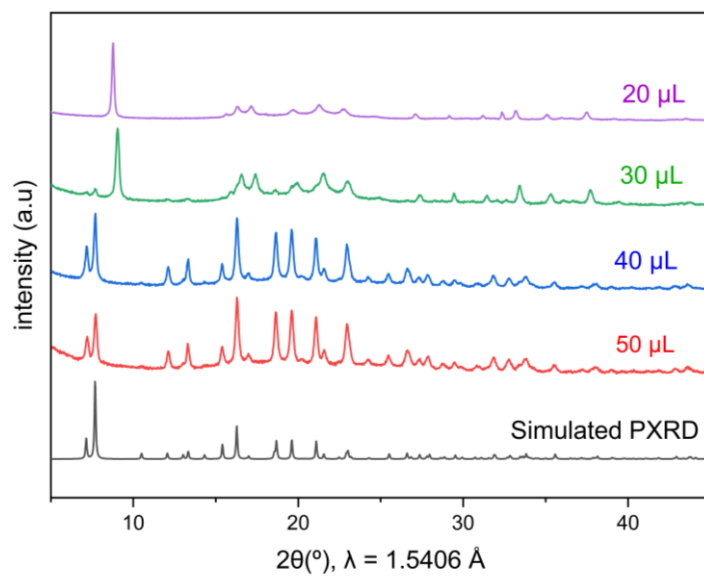

Fig. S.3. Evaluation of the concentration of DMF in the synthesis of mechanochemical ZIF-9.

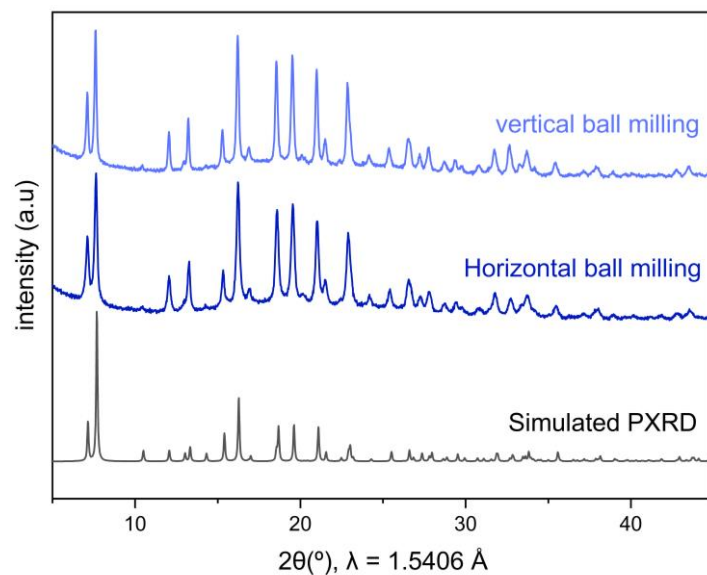

Fig. S.4. X-Ray diffraction patterns for mechanochemical ZIF-9 using a shaker mill with a vertical movement (light blue) and with horizontal movement (dark blue).

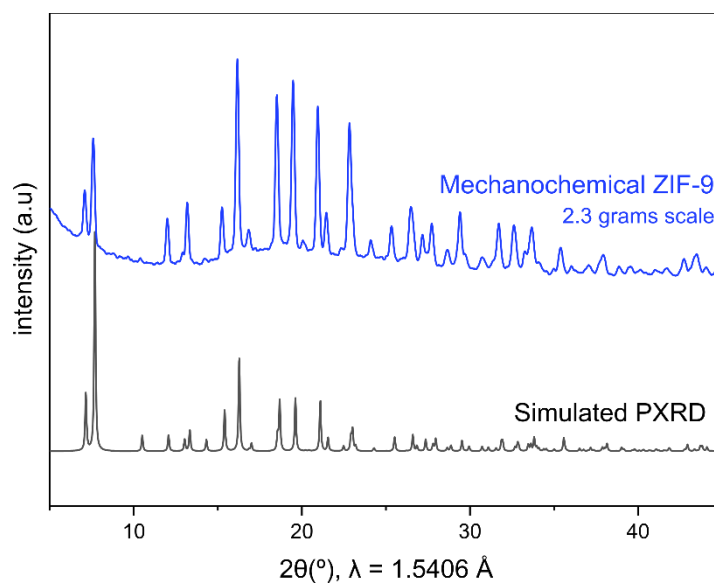

Fig. S.5. X-Ray diffraction patterns for 2.3 grams scale of mechanochemical ZIF-9.

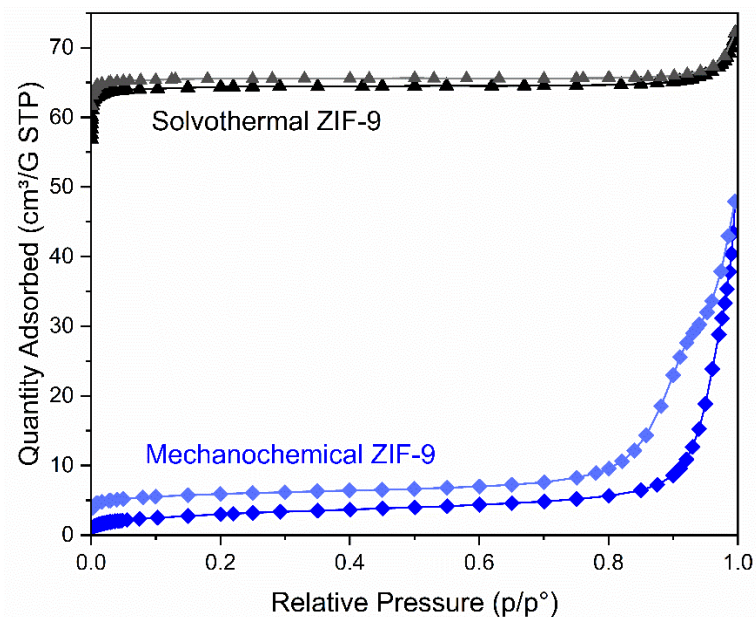

Fig.S.6. Adsorption isotherms for solvothermal synthesized ZIF-9 (black) and mechanochemical synthesized ZIF-9 (blue).

Table S.1. Specific surface area (BET) analysis of solvothermal and mechanochemical ZIF-9.

| Material              | Specific surface area (BET) [m <sup>2</sup> /g] | Uncertainty (BET) [m <sup>2</sup> /g] | C      | Cor. Coeff. | Measuring [p/p <sub>0</sub> ] |
|-----------------------|-------------------------------------------------|---------------------------------------|--------|-------------|-------------------------------|
| Solvothermal ZIF-9    | 274.06                                          | ± 0.0652                              | 18839  | 0.9999      | 0.00108 - 0.00478             |
| Mechanochemical ZIF-9 | 10.93                                           | ±0.0298                               | 76.079 | 0.9999      | 0.05554 – 0.21977             |

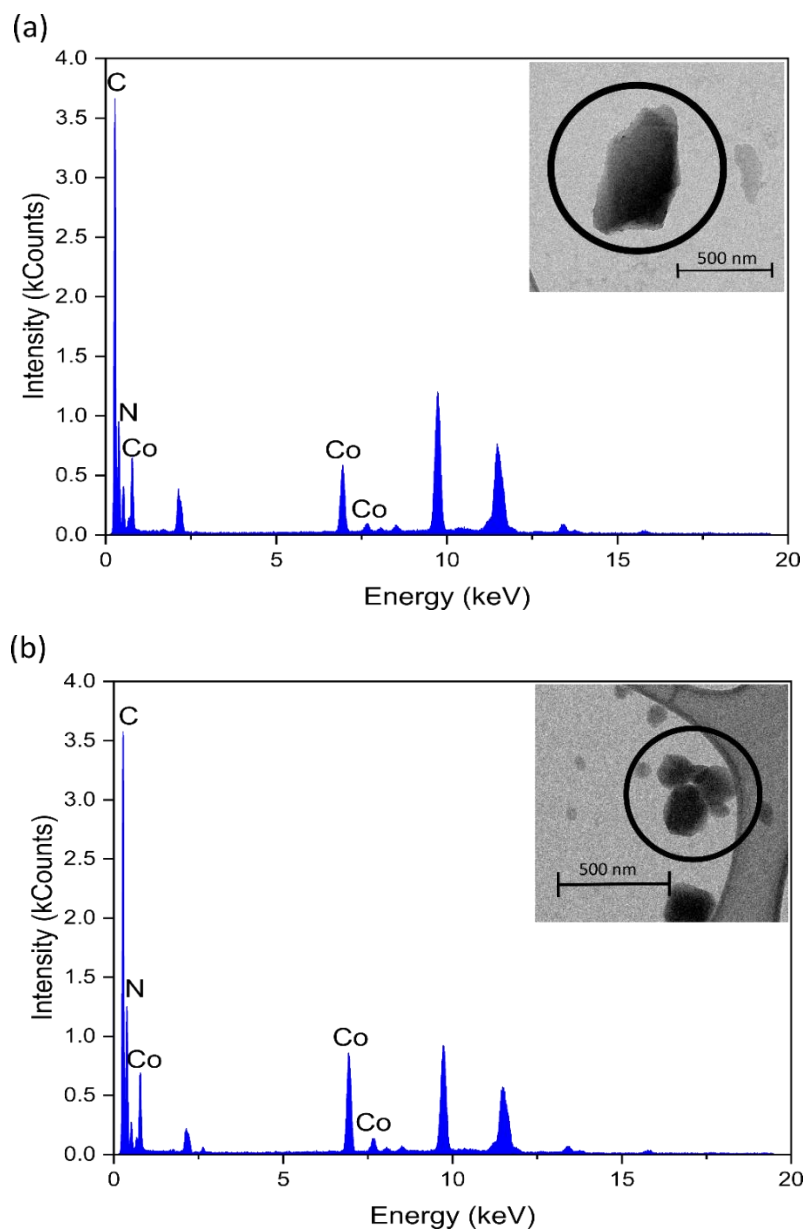

Fig.S.7. EDS spectra for solvothermal synthesized ZIF-9 (a) and mechanochemical synthesized ZIF-9 (b).

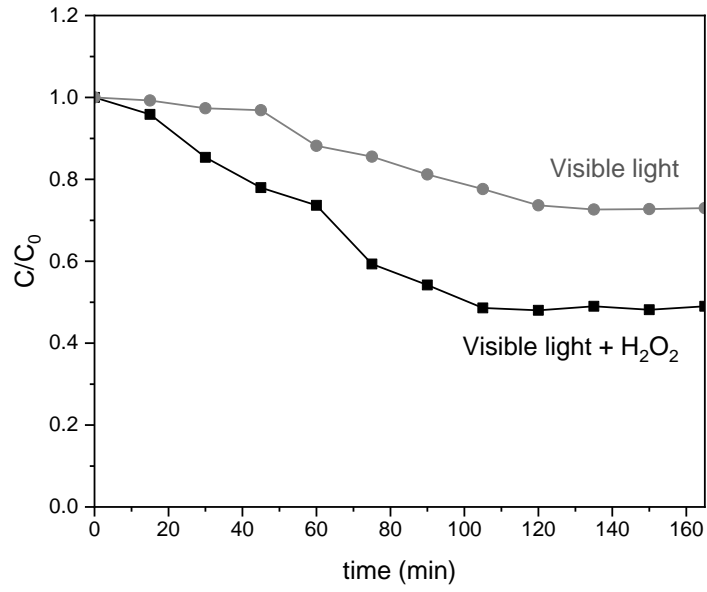

Fig.S.8. Methylene blue degradation by influence of visible light (grey) and the combined action of visible light and H<sub>2</sub>O<sub>2</sub> (black).



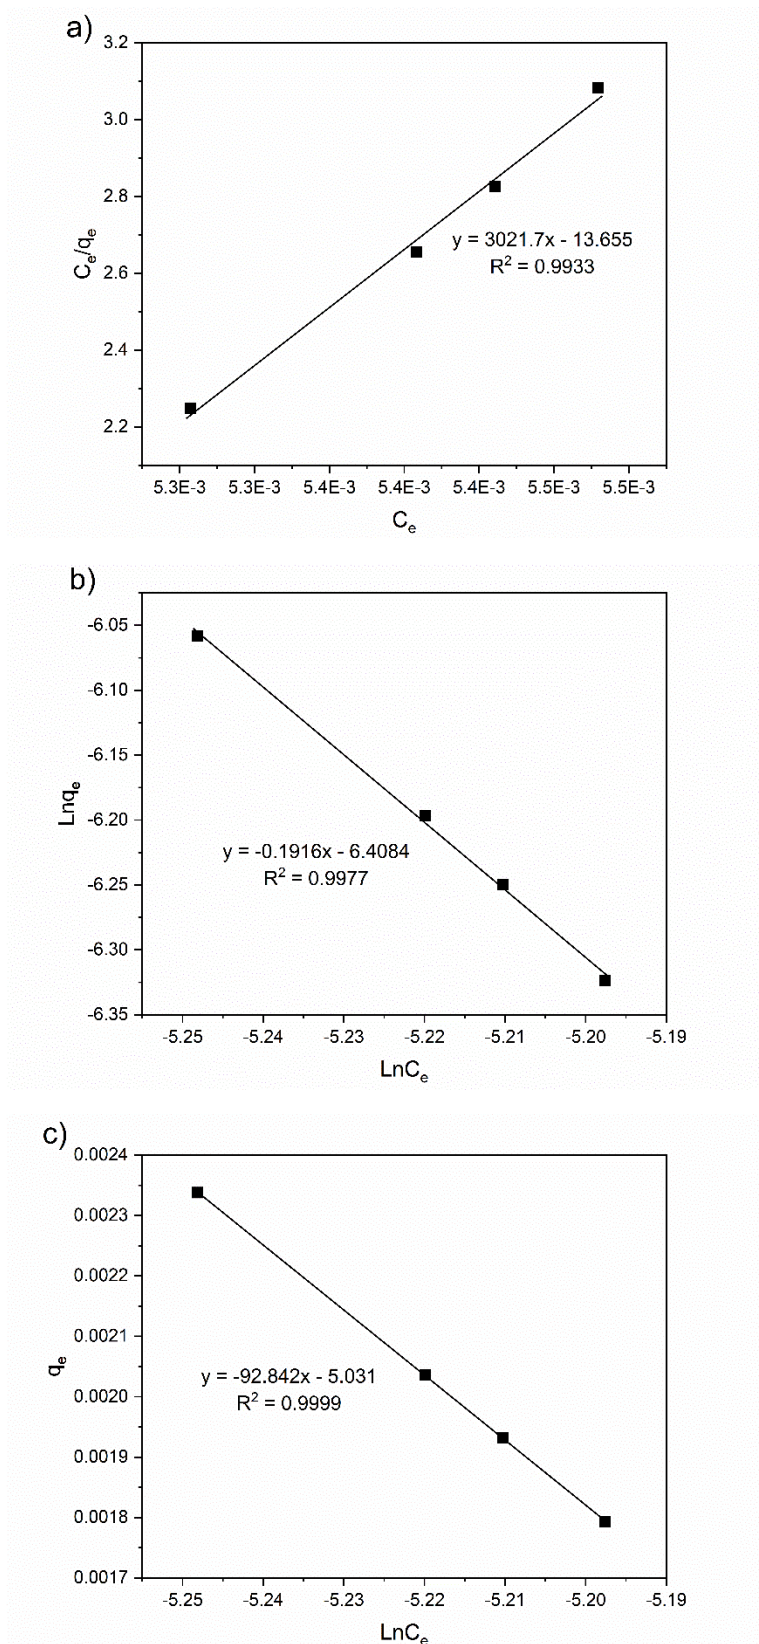

Fig. S.9. MB adsorption on mechanochemical synthesized ZIF-9 based on a) Langmuir, b) Freundlich and c) Tempkin isotherms.

Table S.2. Langmuir, Freundlich and Tempkin model parameters for mechanochemical synthesized ZIF-9.

| Langmuir $K_L$ ( $L\ mg^{-1}$ ) | $q_e$ ( $mg\ g^{-1}$ ) | $R^2$  | Freundlich $K_F$ [ $(mg\ g^{-1}) \cdot (L\ mg^{-1})^{1/n}$ ] | n        | $R^2$  | Tempkin $K_T$ ( $L\ mg^{-1}$ ) | f       | $R^2$  |
|---------------------------------|------------------------|--------|--------------------------------------------------------------|----------|--------|--------------------------------|---------|--------|
| -2.213E+02                      | 3.309E-04              | 0.9933 | 0.001648                                                     | -5.21921 | 0.9977 | -92.842                        | 1.05568 | 0.9999 |

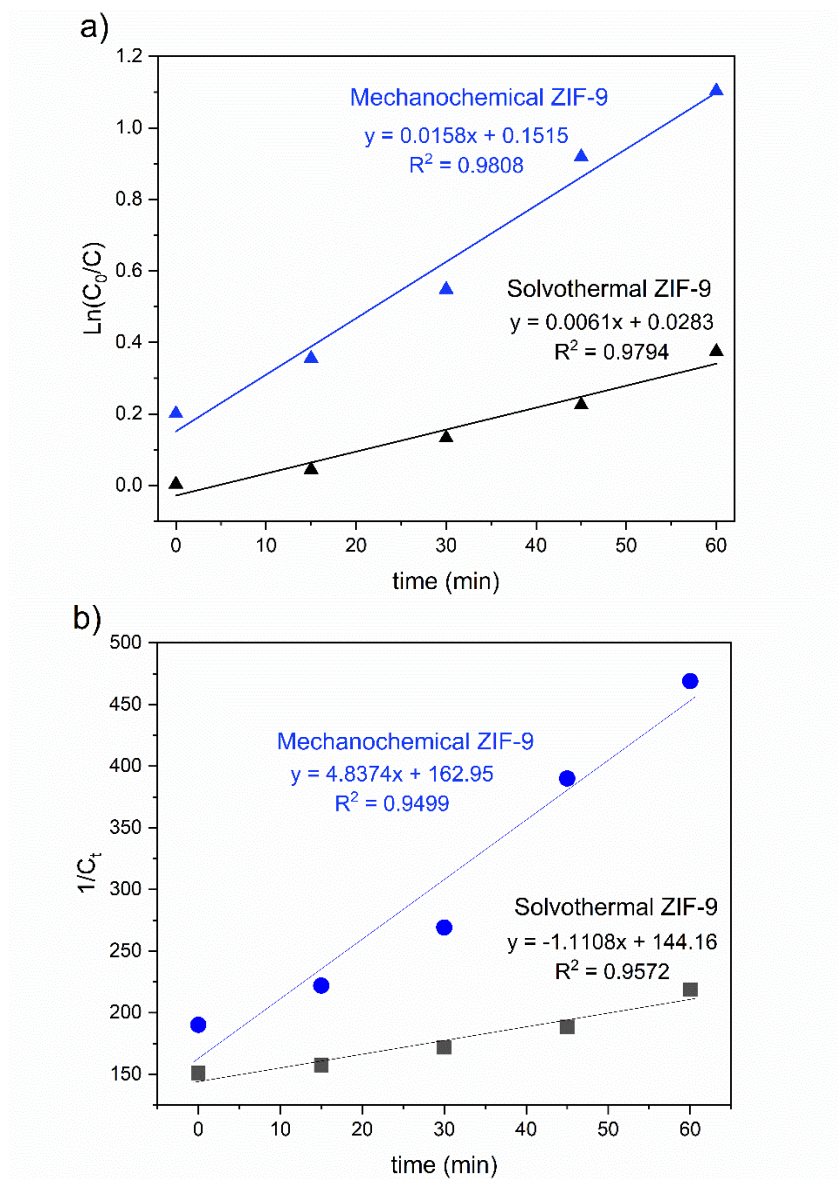

Fig.S.10. Zero-order (a) and pseudo-second order (b) kinetics for solvothermal synthesized ZIF-9 (black) and mechanochemical synthesized ZIF-9 (blue)

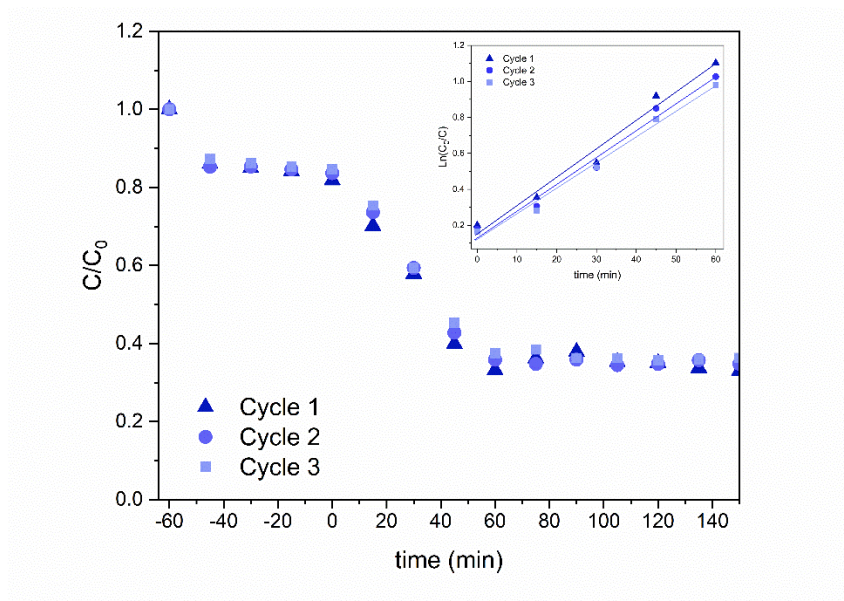

Fig. S.11. Recyclability and first- order kinetic of mechanochemical synthesized ZIF-9 over three cycles.
